# Supplementary material
Source: PubMed Central journal article supplement (PMC7159289)
Supplement: mmc1.pdf [file mmc1.pdf]

# THE LANCET

## Supplementary appendix

This appendix formed part of the original submission and has been peer reviewed.  
We post it as supplied by the authors.

Supplement to: Yang G, Wang Y, Zeng Y, et al. Rapid health transition in China, 1990–2010: findings from the Global Burden of Disease Study 2010. *Lancet* 2013; **381**: 1987–2015.

## Appendix to Rapid health transition in China 1990-2010: findings from the Global Burden of Disease Study 2010

This appendix provides supplemental figures and a table as referred to in the paper:

Webappendix Figure 1: Details on each of the sources used for measuring the under-five mortality rate in China.

Web Appendix Figure 1: Child Mortality Rate in China, 1990–2011

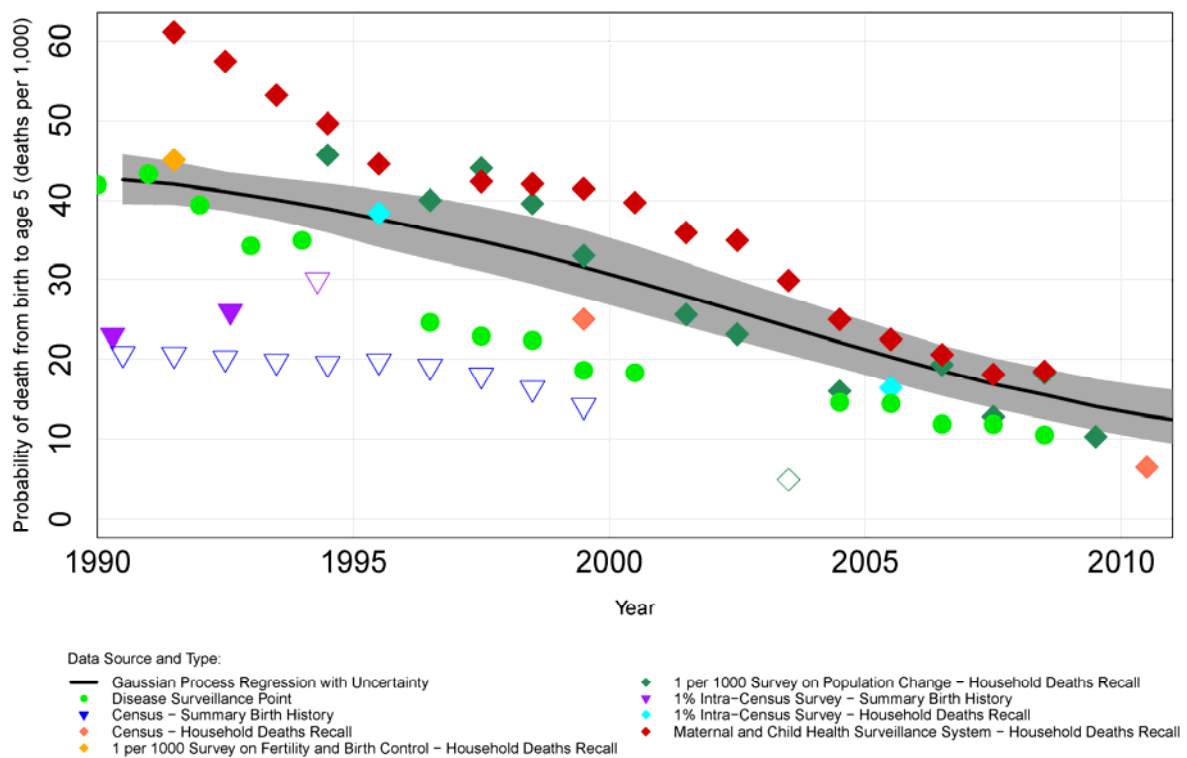

\*Hollow points indicate data excluded from the analysis

Webappendix Figure 2: Details on each of the sources used for measuring the probability of death between age 15 and 60 in China.

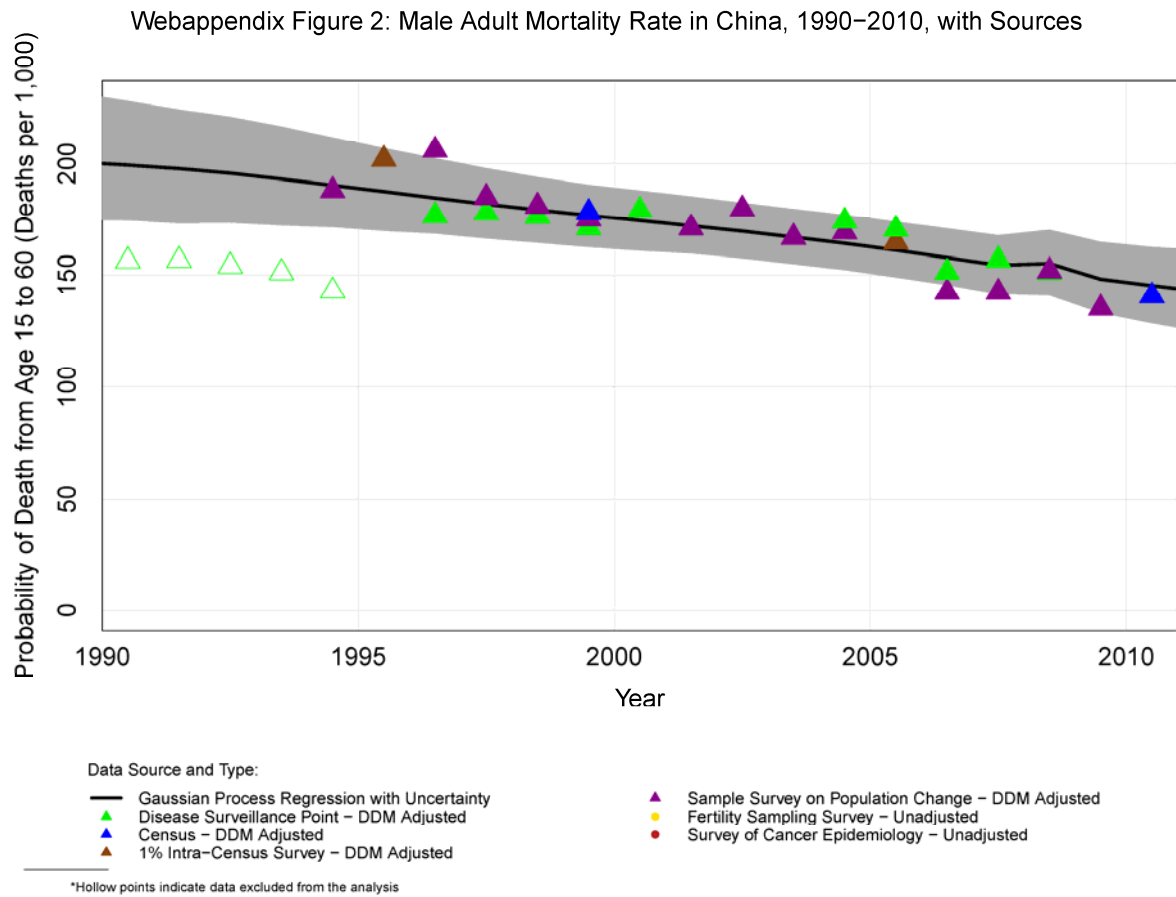

Webappendix Figure 2: Female Adult Mortality Rate in China, 1990–2010, with Sources

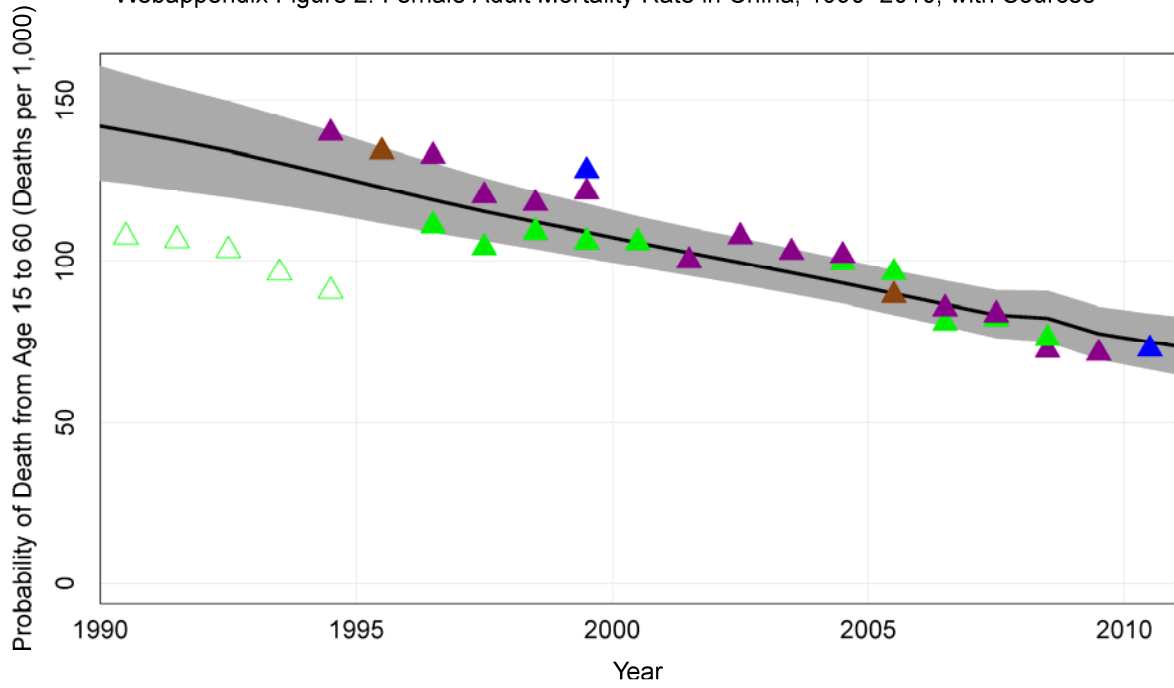

Data Source and Type:

- Gaussian Process Regression with Uncertainty
- ▲ Disease Surveillance Point - DDM Adjusted
- ▲ Sample Survey on Population Change - DDM Adjusted
- ▲ Census - DDM Adjusted
- ▲ Fertility Sampling Survey - Unadjusted
- ▲ 1% Intra-Census Survey - DDM Adjusted
- ▲ Survey of Cancer Epidemiology - Unadjusted

\*Hollow points indicate data excluded from the analysis

Webappendix Figure 3: Distribution of deaths in adult age group 15-79 in 2010 by sources.

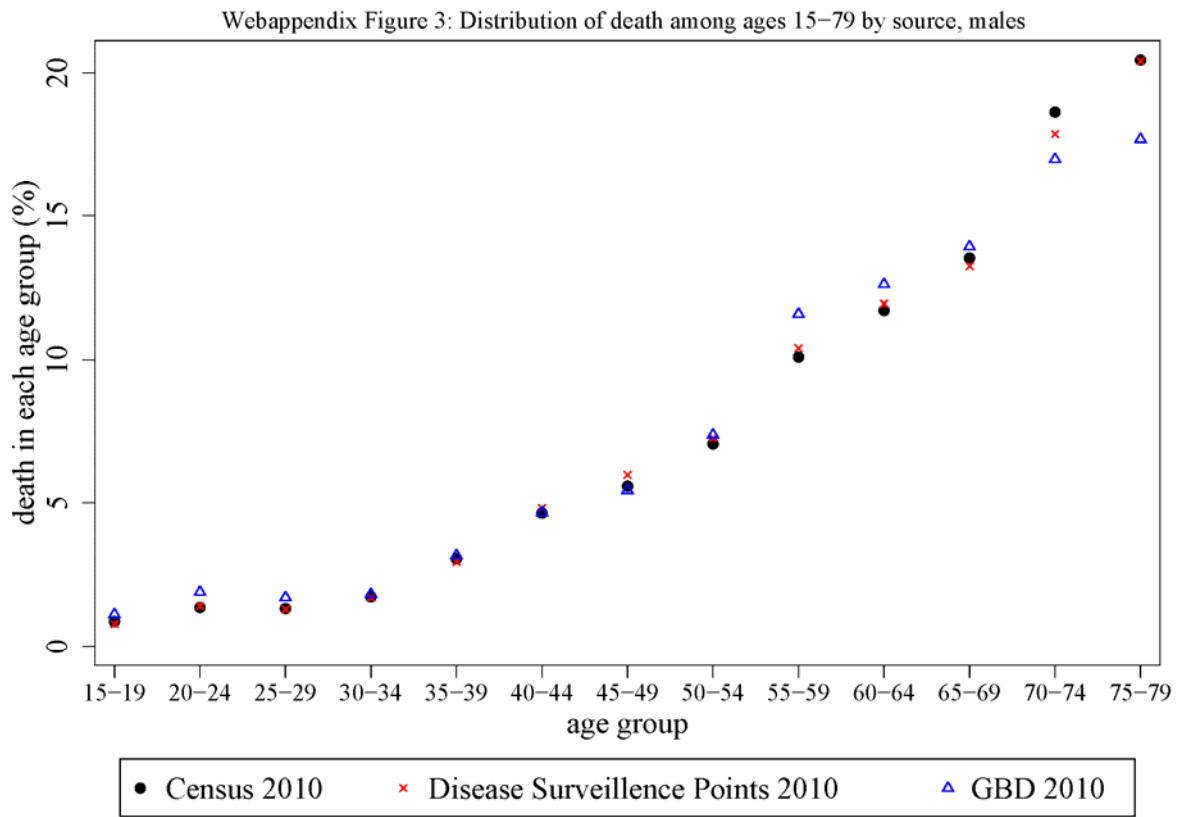

Webappendix Figure 3: Distribution of death among ages 15–79 by source, females

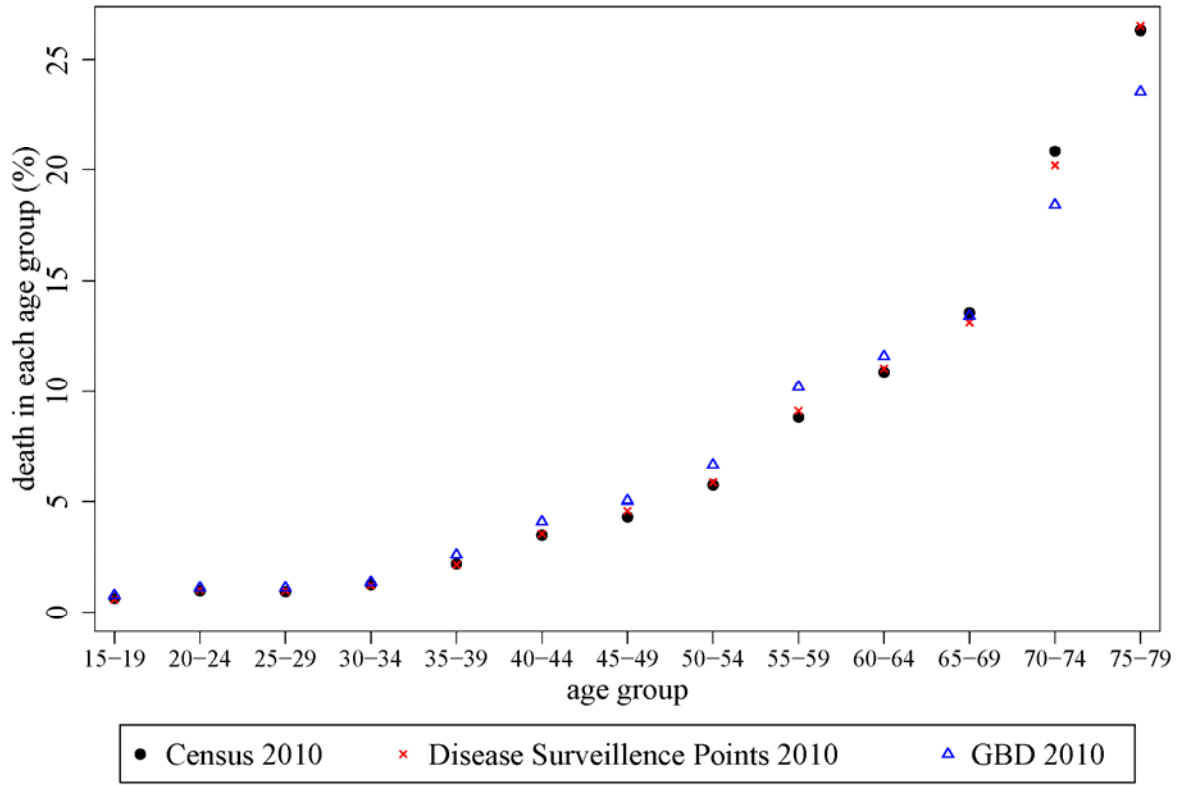

Webappendix Figure 4: Years lived with disability (YLDs) per person in 1990 and 2010 for all ages, by sex in China.

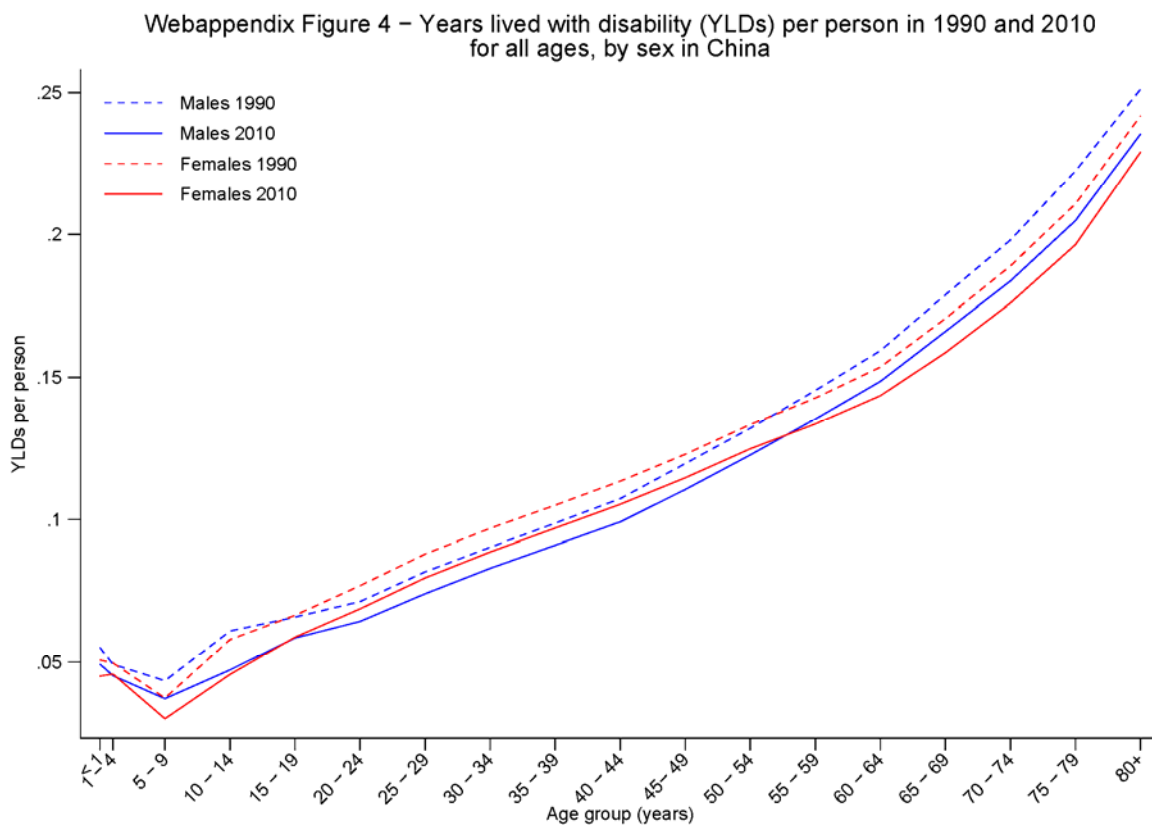

Webappendix Figure 5: Figure 5a – Age-standardised DALY rates relative to the 19 countries that are members of the Group of 20 and ranking by cause in 2010 for males. Figure 5b – Age-standardised DALY rates relative to the 19 countries that are members of the Group of 20 and ranking by cause in 2010 for females. Numbers in cells indicate the ranks of each country for each cause, with 1 representing the best performing country. Countries have been sorted on the basis of age-standardised all-cause DALYs for that year. Causes are ordered by the 30 leading causes of DALYs in China. Colours indicate whether the age-standardised DALY rate for the country is significantly lower (green), higher (red), or indistinguishable (yellow) from the mean age-standardised DALY rate across comparator countries, with 95% confidence. DALYs=disability-adjusted life years. UI = uncertainty level. COPD=chronic obstructive pulmonary disease.

| Webappendix Figure 5A - Ranking of leading age-standardized cause rates of disability-adjusted life years (DALYs) relative to comparator countries for males in 2010 |           |             |                        |           |               |             |              |           |                |          |                           |           |           |                              |                   |                       |           |           |                      |                   |                       |               |                         |                    |                             |  |  |  |  |  |
|----------------------------------------------------------------------------------------------------------------------------------------------------------------------|-----------|-------------|------------------------|-----------|---------------|-------------|--------------|-----------|----------------|----------|---------------------------|-----------|-----------|------------------------------|-------------------|-----------------------|-----------|-----------|----------------------|-------------------|-----------------------|---------------|-------------------------|--------------------|-----------------------------|--|--|--|--|--|
| Country                                                                                                                                                              | Stroke    | Road injury | Ischemic heart disease | COPD      | Low back pain | Lung cancer | Liver cancer | Falls     | Stomach cancer | Diabetes | Major depressive disorder | Self-harm | Neck pain | Lower respiratory infections | Esophageal cancer | Alcohol use disorders | Drowning  | Cirrhosis | Congenital anomalies | Colorectal cancer | Other musculoskeletal | Schizophrenia | Neonatal encephalopathy | Other hearing loss | Preterm birth complications |  |  |  |  |  |
| Japan                                                                                                                                                                | 9         | 1           | 2                      | 1         | 12            | 8           | 17           | 6         | 16             | 2        | 1                         | 17        | 13        | 9                            | 12                | 5                     | 8         | 5         | 3                    | 12                | 15                    | 16            | 1                       | 8                  | 1                           |  |  |  |  |  |
| Italy                                                                                                                                                                | 7         | 10          | 4                      | 4         | 15            | 12          | 15           | 14        | 12             | 7        | 13                        | 4         | 16        | 1                            | 4                 | 3                     | 3         | 7         | 6                    | 13                | 7                     | 2             | 4                       | 5                  | 5                           |  |  |  |  |  |
| Australia                                                                                                                                                            | 1         | 5           | 5                      | 9         | 13            | 7           | 3            | 12        | 3              | 4        | 4                         | 11        | 15        | 2                            | 7                 | 7                     | 5         | 1         | 5                    | 17                | 13                    | 14            | 9                       | 6                  | 4                           |  |  |  |  |  |
| Canada                                                                                                                                                               | 2         | 2           | 8                      | 7         | 16            | 13          | 2            | 2         | 4              | 9        | 8                         | 14        | 12        | 3                            | 5                 | 9                     | 6         | 4         | 8                    | 10                | 18                    | 19            | 8                       | 7                  | 7                           |  |  |  |  |  |
| South Korea                                                                                                                                                          | 11        | 7           | 1                      | 2         | 6             | 10          | 18           | 11        | 19             | 14       | 2                         | 16        | 17        | 6                            | 10                | 14                    | 10        | 14        | 1                    | 11                | 16                    | 17            | 2                       | 10                 | 2                           |  |  |  |  |  |
| Germany                                                                                                                                                              | 4         | 4           | 11                     | 5         | 19            | 15          | 7            | 16        | 9              | 6        | 14                        | 10        | 14        | 5                            | 9                 | 13                    | 1         | 12        | 4                    | 16                | 10                    | 6             | 3                       | 1                  | 6                           |  |  |  |  |  |
| United Kingdom                                                                                                                                                       | 6         | 3           | 9                      | 10        | 18            | 9           | 1            | 15        | 6              | 1        | 6                         | 9         | 11        | 8                            | 15                | 11                    | 2         | 8         | 7                    | 14                | 11                    | 11            | 5                       | 2                  | 9                           |  |  |  |  |  |
| France                                                                                                                                                               | 3         | 8           | 3                      | 3         | 17            | 16          | 16           | 17        | 7              | 3        | 12                        | 15        | 10        | 4                            | 16                | 17                    | 7         | 11        | 2                    | 15                | 12                    | 7             | 7                       | 3                  | 3                           |  |  |  |  |  |
| United States                                                                                                                                                        | 5         | 11          | 13                     | 12        | 2             | 14          | 11           | 3         | 2              | 12       | 10                        | 12        | 18        | 7                            | 8                 | 12                    | 9         | 10        | 9                    | 9                 | 19                    | 18            | 6                       | 4                  | 11                          |  |  |  |  |  |
| <b>China</b>                                                                                                                                                         | <b>17</b> | <b>14</b>   | <b>6</b>               | <b>17</b> | <b>3</b>      | <b>17</b>   | <b>19</b>    | <b>13</b> | <b>18</b>      | <b>8</b> | <b>5</b>                  | <b>8</b>  | <b>5</b>  | <b>10</b>                    | <b>19</b>         | <b>8</b>              | <b>17</b> | <b>6</b>  | <b>12</b>            | <b>7</b>          | <b>2</b>              | <b>15</b>     | <b>13</b>               | <b>14</b>          | <b>8</b>                    |  |  |  |  |  |
| Saudi Arabia                                                                                                                                                         | 12        | 19          | 16                     | 6         | 9             | 1           | 13           | 10        | 1              | 19       | 17                        | 1         | 1         | 12                           | 2                 | 1                     | 13        | 3         | 13                   | 2                 | 4                     | 4             | 12                      | 9                  | 16                          |  |  |  |  |  |
| Mexico                                                                                                                                                               | 8         | 13          | 10                     | 8         | 1             | 2           | 10           | 4         | 8              | 18       | 3                         | 5         | 6         | 13                           | 3                 | 15                    | 14        | 19        | 18                   | 3                 | 9                     | 12            | 14                      | 15                 | 12                          |  |  |  |  |  |
| Argentina                                                                                                                                                            | 10        | 12          | 15                     | 11        | 4             | 11          | 5            | 8         | 13             | 11       | 15                        | 13        | 19        | 14                           | 13                | 16                    | 12        | 13        | 15                   | 18                | 14                    | 13            | 11                      | 13                 | 13                          |  |  |  |  |  |
| Turkey                                                                                                                                                               | 16        | 6           | 18                     | 15        | 11            | 19          | 12           | 9         | 15             | 10       | 19                        | 7         | 2         | 11                           | 1                 | 2                     | 4         | 2         | 19                   | 8                 | 5                     | 5             | 10                      | 11                 | 14                          |  |  |  |  |  |
| Brazil                                                                                                                                                               | 14        | 16          | 14                     | 13        | 10            | 4           | 9            | 7         | 14             | 13       | 16                        | 6         | 7         | 15                           | 14                | 18                    | 16        | 15        | 14                   | 6                 | 6                     | 10            | 16                      | 17                 | 17                          |  |  |  |  |  |
| Indonesia                                                                                                                                                            | 18        | 18          | 12                     | 16        | 7             | 6           | 8            | 5         | 10             | 16       | 11                        | 2         | 4         | 17                           | 6                 | 4                     | 11        | 18        | 10                   | 4                 | 3                     | 8             | 19                      | 18                 | 15                          |  |  |  |  |  |
| Russia                                                                                                                                                               | 19        | 15          | 19                     | 14        | 14            | 18          | 6            | 18        | 17             | 5        | 18                        | 19        | 8         | 16                           | 11                | 19                    | 19        | 16        | 17                   | 19                | 8                     | 9             | 15                      | 12                 | 10                          |  |  |  |  |  |
| India                                                                                                                                                                | 13        | 17          | 17                     | 19        | 8             | 3           | 4            | 19        | 11             | 15       | 7                         | 18        | 3         | 19                           | 17                | 6                     | 18        | 17        | 16                   | 1                 | 1                     | 1             | 18                      | 19                 | 19                          |  |  |  |  |  |
| South Africa                                                                                                                                                         | 15        | 9           | 7                      | 18        | 5             | 5           | 14           | 1         | 5              | 17       | 9                         | 3         | 9         | 18                           | 18                | 10                    | 15        | 9         | 11                   | 5                 | 17                    | 3             | 17                      | 16                 | 18                          |  |  |  |  |  |

  

| Ranking Legend | Lower than mean (95% confidence) | Indistinguishable from mean (95% confidence) | Higher than mean (95% confidence) |
|----------------|----------------------------------|----------------------------------------------|-----------------------------------|
|                |                                  |                                              |                                   |



**Webappendix Figure 5B - Ranking of leading age-standardized cause rates of disability-adjusted life years (DALYs) relative to comparator countries for females in 2010**

| Country        | Stroke    | Low back pain | COPD      | Ischemic heart disease | Major depressive disorder | Diabetes  | Other musculoskeletal | Neck pain | Road injury | Lung cancer | Osteoarthritis | Self-harm | Falls     | Liver cancer | Lower respiratory infections | Stomach cancer | Congenital anomalies | Anxiety disorders | Iron-deficiency anemia | Breast cancer | Schizophrenia | Migraine | Bipolar disorder | Colorectal cancer | Dysthymia |
|----------------|-----------|---------------|-----------|------------------------|---------------------------|-----------|-----------------------|-----------|-------------|-------------|----------------|-----------|-----------|--------------|------------------------------|----------------|----------------------|-------------------|------------------------|---------------|---------------|----------|------------------|-------------------|-----------|
| Japan          | 8         | 12            | 1         | 1                      | 1                         | 3         | 17                    | 10        | 1           | 6           | 14             | 17        | 7         | 15           | 8                            | 16             | 3                    | 2                 | 10                     | 5             | 15            | 2        | 2                | 10                | 1         |
| South Korea    | 11        | 8             | 2         | 3                      | 2                         | 12        | 16                    | 11        | 8           | 10          | 11             | 18        | 8         | 17           | 6                            | 19             | 1                    | 11                | 6                      | 2             | 17            | 17       | 4                | 8                 | 2         |
| Italy          | 5         | 15            | 4         | 4                      | 12                        | 6         | 9                     | 17        | 9           | 9           | 2              | 4         | 15        | 10           | 1                            | 12             | 6                    | 8                 | 1                      | 16            | 2             | 18       | 1                | 15                | 5         |
| Australia      | 1         | 14            | 11        | 5                      | 4                         | 4         | 15                    | 12        | 10          | 14          | 3              | 9         | 13        | 1            | 2                            | 3              | 5                    | 13                | 9                      | 11            | 14            | 19       | 6                | 18                | 11        |
| France         | 2         | 17            | 3         | 2                      | 11                        | 2         | 11                    | 16        | 7           | 11          | 1              | 14        | 19        | 8            | 3                            | 5              | 2                    | 19                | 3                      | 17            | 6             | 7        | 5                | 12                | 6         |
| Germany        | 3         | 19            | 5         | 8                      | 13                        | 5         | 10                    | 15        | 3           | 15          | 4              | 10        | 16        | 4            | 4                            | 9              | 4                    | 12                | 4                      | 14            | 5             | 9        | 3                | 13                | 9         |
| Canada         | 4         | 16            | 10        | 7                      | 8                         | 7         | 18                    | 18        | 4           | 18          | 10             | 13        | 3         | 2            | 5                            | 4              | 8                    | 5                 | 7                      | 15            | 19            | 11       | 9                | 14                | 17        |
| United Kingdom | 6         | 18            | 13        | 6                      | 5                         | 1         | 12                    | 14        | 2           | 17          | 8              | 6         | 17        | 3            | 9                            | 6              | 7                    | 15                | 5                      | 19            | 11            | 15       | 7                | 16                | 7         |
| <b>China</b>   | <b>16</b> | <b>5</b>      | <b>17</b> | <b>10</b>              | <b>6</b>                  | <b>10</b> | <b>5</b>              | <b>5</b>  | <b>15</b>   | <b>16</b>   | <b>12</b>      | <b>15</b> | <b>12</b> | <b>19</b>    | <b>10</b>                    | <b>17</b>      | <b>12</b>            | <b>1</b>          | <b>11</b>              | <b>3</b>      | <b>16</b>     | <b>1</b> | <b>14</b>        | <b>7</b>          | <b>19</b> |
| United States  | 7         | 2             | 16        | 14                     | 10                        | 11        | 19                    | 19        | 13          | 19          | 7              | 12        | 4         | 6            | 7                            | 2              | 9                    | 16                | 2                      | 12            | 18            | 5        | 8                | 11                | 16        |
| Mexico         | 9         | 1             | 7         | 13                     | 3                         | 18        | 13                    | 6         | 12          | 2           | 17             | 3         | 1         | 16           | 14                           | 14             | 18                   | 3                 | 8                      | 6             | 9             | 8        | 19               | 3                 | 8         |
| Argentina      | 10        | 4             | 9         | 12                     | 15                        | 8         | 14                    | 13        | 11          | 8           | 6              | 11        | 6         | 11           | 15                           | 10             | 16                   | 14                | 13                     | 18            | 13            | 4        | 10               | 17                | 10        |
| Saudi Arabia   | 14        | 9             | 8         | 16                     | 17                        | 16        | 4                     | 1         | 18          | 1           | 19             | 1         | 10        | 12           | 13                           | 1              | 13                   | 17                | 15                     | 1             | 3             | 3        | 12               | 1                 | 4         |
| Brazil         | 12        | 10            | 12        | 15                     | 16                        | 15        | 7                     | 8         | 14          | 7           | 18             | 5         | 5         | 13           | 16                           | 13             | 15                   | 10                | 12                     | 8             | 8             | 13       | 11               | 9                 | 12        |
| Turkey         | 17        | 11            | 14        | 18                     | 19                        | 13        | 2                     | 3         | 6           | 12          | 16             | 7         | 9         | 7            | 12                           | 15             | 19                   | 18                | 17                     | 9             | 4             | 10       | 15               | 5                 | 3         |
| Russia         | 18        | 13            | 6         | 19                     | 18                        | 9         | 6                     | 7         | 17          | 4           | 13             | 16        | 11        | 9            | 11                           | 18             | 14                   | 4                 | 14                     | 13            | 10            | 12       | 16               | 19                | 15        |
| Indonesia      | 19        | 6             | 15        | 11                     | 14                        | 17        | 3                     | 4         | 19          | 13          | 9              | 8         | 14        | 18           | 17                           | 8              | 10                   | 7                 | 16                     | 10            | 12            | 14       | 18               | 6                 | 18        |
| India          | 13        | 7             | 19        | 17                     | 7                         | 14        | 1                     | 2         | 16          | 3           | 5              | 19        | 18        | 5            | 19                           | 11             | 17                   | 6                 | 19                     | 4             | 1             | 16       | 17               | 2                 | 13        |
| South Africa   | 15        | 3             | 18        | 9                      | 9                         | 19        | 8                     | 9         | 5           | 5           | 15             | 2         | 2         | 14           | 18                           | 7              | 11                   | 9                 | 18                     | 7             | 7             | 6        | 13               | 4                 | 14        |

Ranking Legend: ■ Lower than mean (95% confidence) ■ Indistinguishable from mean (95% confidence) ■ Higher than mean (95% confidence)

Webappendix Figure 6: Burden of disease attributable to the 14 dietary risk factors for both sexes in 2010, expressed as a percentage of China disability-adjusted life-years.

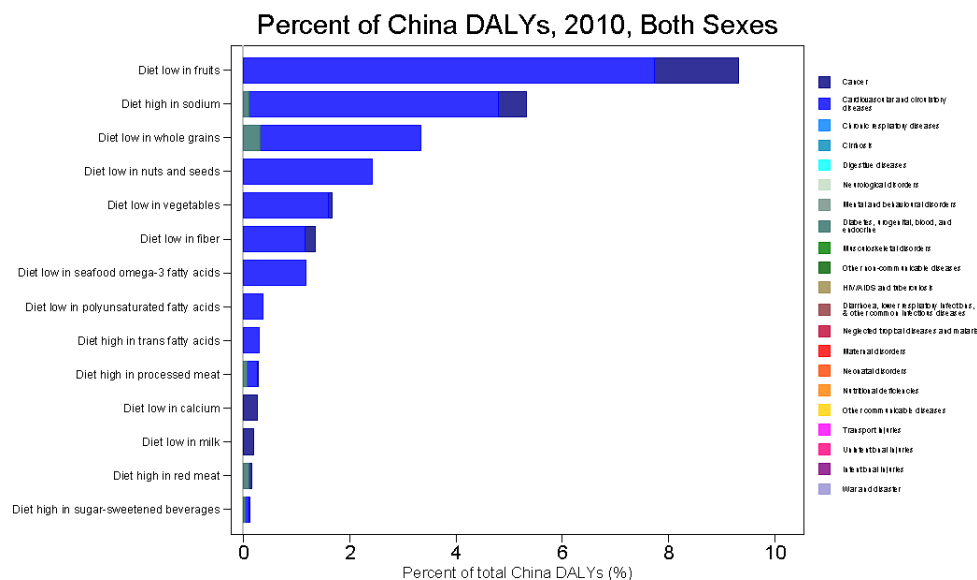

Webappendix Figure 7: Age-standardised DALY rates relative to the 19 countries that are members of the Group of 20 and ranking by risk factor in 2010 for both sexes combined. Numbers in cells indicate the ranks of each country for each risk factor, with 1 representing the best performing country. Countries have been sorted on the basis of age-standardised all-cause DALYs for that year. Risk factors are ordered by the 25 leading causes of DALYs in China. Colours indicate whether the age-standardised DALY rate for the country is significantly lower (green), higher (red), or indistinguishable (yellow) from the mean age-standardised DALY rate across comparator countries, with 95% confidence (gray indicates that a country was not ranked due to lack of DALYs). DALYs=disability-adjusted life years. UI = uncertainty level.

**Webappendix Figure 7 - Ranking of leading age-standardized risk rates of disability-adjusted life years (DALYs) relative to comparator countries for both sexes in 2010**

| Country        | Dietary risks | High blood pressure | Smoking   | Ambient PM pollution | Household air pollution | High fasting plasma glucose | Alcohol use | Occupational risks | High body-mass index | Physical inactivity | High total cholesterol | Drug use | Iron deficiency | Intimate partner violence | Lead      | Suboptimal breastfeeding | Low bone mineral density | Childhood sexual abuse | Radon     | Ozone     | Childhood underweight | Sanitation | Zinc deficiency | Unimproved water | Vitamin A deficiency |
|----------------|---------------|---------------------|-----------|----------------------|-------------------------|-----------------------------|-------------|--------------------|----------------------|---------------------|------------------------|----------|-----------------|---------------------------|-----------|--------------------------|--------------------------|------------------------|-----------|-----------|-----------------------|------------|-----------------|------------------|----------------------|
| Japan          | 3             | 3                   | 2         | 9                    |                         | 2                           | 4           | 2                  | 1                    | 1                   | 2                      | 6        | 8               | 5                         | 2         |                          | 8                        | 8                      | 3         | 6         | 9                     | 11         | 12              | 6                | 9                    |
| Italy          | 4             | 6                   | 6         | 8                    |                         | 5                           | 2           | 3                  | 7                    | 5                   | 7                      | 11       | 2               | 4                         | 6         |                          | 15                       | 10                     | 17        | 13        | 1                     | 6          | 4               | 7                | 2                    |
| South Korea    | 7             | 5                   | 5         | 13                   | 9                       | 8                           | 15          | 5                  | 3                    | 4                   | 1                      | 7        | 7               | 7                         | 10        |                          | 13                       | 11                     | 13        | 3         | 3                     | 14         | 10              | 8                | 10                   |
| Australia      | 1             | 2                   | 4         | 1                    |                         | 4                           | 5           | 8                  | 8                    | 3                   | 6                      | 15       | 10              | 3                         | 7         |                          | 11                       | 15                     | 2         | 1         | 2                     | 5          | 2               | 5                | 7                    |
| Canada         | 5             | 1                   | 9         | 4                    |                         | 7                           | 7           | 7                  | 10                   | 9                   | 9                      | 14       | 6               | 8                         | 1         |                          | 3                        | 16                     | 8         | 9         | 4                     | 1          | 8               | 1                | 1                    |
| Germany        | 8             | 9                   | 8         | 10                   |                         | 6                           | 8           | 14                 | 11                   | 7                   | 16                     | 9        | 4               | 6                         | 5         |                          | 16                       | 12                     | 12        | 10        | 7                     | 4          | 7               | 3                | 8                    |
| France         | 2             | 4                   | 7         | 6                    |                         | 1                           | 13          | 11                 | 6                    | 2                   | 4                      | 4        | 3               | 10                        | 3         |                          | 18                       | 6                      | 19        | 7         | 6                     | 8          | 1               | 4                | 5                    |
| United Kingdom | 6             | 8                   | 11        | 7                    |                         | 3                           | 10          | 10                 | 9                    | 8                   | 11                     | 18       | 5               | 1                         | 9         |                          | 12                       | 14                     | 11        | 11        | 8                     | 3          | 5               | 2                | 6                    |
| United States  | 9             | 7                   | 13        | 11                   |                         | 9                           | 11          | 1                  | 12                   | 10                  | 13                     | 19       | 1               | 11                        | 4         |                          | 2                        | 18                     | 14        | 16        | 5                     | 2          | 6               | 12               | 3                    |
| <b>China</b>   | <b>15</b>     | <b>12</b>           | <b>12</b> | <b>18</b>            | <b>17</b>               | <b>10</b>                   | <b>9</b>    | <b>16</b>          | <b>4</b>             | <b>6</b>            | <b>5</b>               | <b>1</b> | <b>11</b>       | <b>12</b>                 | <b>12</b> | <b>13</b>                | <b>17</b>                | <b>4</b>               | <b>18</b> | <b>18</b> | <b>13</b>             | <b>15</b>  | <b>13</b>       | <b>15</b>        | <b>12</b>            |
| Mexico         | 10            | 10                  | 3         | 12                   | 15                      | 18                          | 16          | 4                  | 15                   | 12                  | 12                     | 5        | 9               | 2                         | 14        | 16                       | 5                        | 3                      | 5         | 15        | 16                    | 9          | 16              | 14               | 15                   |
| Saudi Arabia   | 13            | 15                  | 1         | 17                   | 11                      | 19                          | 1           | 6                  | 18                   | 18                  | 15                     | 10       | 15              | 9                         | 8         | 11                       | 9                        | 2                      | 1         | 12        | 15                    | 7          | 11              | 16               | 14                   |
| Argentina      | 11            | 11                  | 14        | 2                    | 10                      | 11                          | 12          | 13                 | 14                   | 11                  | 14                     | 12       | 12              | 13                        | 15        | 12                       | 4                        | 13                     | 9         | 2         | 12                    | 10         | 3               | 10               | 11                   |
| Turkey         | 16            | 16                  | 18        | 16                   | 13                      | 12                          | 6           | 15                 | 16                   | 17                  | 18                     | 8        | 16              | 16                        | 13        | 14                       | 7                        | 9                      | 16        | 17        | 11                    | 13         | 15              | 11               | 13                   |
| Brazil         | 14            | 14                  | 10        | 3                    | 14                      | 13                          | 17          | 17                 | 13                   | 13                  | 17                     | 13       | 14              | 15                        | 16        | 15                       | 10                       | 7                      | 10        | 4         | 14                    | 16         | 14              | 13               | 16                   |
| Indonesia      | 18            | 18                  | 17        | 14                   | 18                      | 14                          | 3           | 18                 | 5                    | 16                  | 8                      | 2        | 17              | 14                        | 17        | 17                       | 14                       | 1                      | 6         | 5         | 18                    | 18         | 18              | 19               | 17                   |
| Russia         | 19            | 19                  | 19        | 15                   | 12                      | 16                          | 19          | 12                 | 19                   | 19                  | 19                     | 16       | 13              | 17                        | 11        |                          | 6                        | 17                     | 15        | 8         | 10                    | 12         | 9               | 9                | 4                    |
| India          | 17            | 13                  | 16        | 19                   | 19                      | 15                          | 14          | 19                 | 2                    | 14                  | 10                     | 3        | 19              | 19                        | 19        | 18                       | 19                       | 19                     | 4         | 19        | 19                    | 19         | 19              | 18               | 18                   |
| South Africa   | 12            | 17                  | 15        | 5                    | 16                      | 17                          | 18          | 9                  | 17                   | 15                  | 3                      | 17       | 18              | 18                        | 18        | 19                       | 1                        | 5                      | 7         | 14        | 17                    | 17         | 17              | 17               | 19                   |

Ranking Legend: ■ Lower than mean (95% confidence) ■ Indistinguishable from mean (95% confidence) ■ Higher than mean (95% confidence)

Webappendix Figure 8: Burden of disease attributable to the 25 leading risk factors for both sexes in 1990 and 2010, expressed as a percentage of China deaths. Figure 8a – Percent of total China deaths in 1990. Figure 8b – Percent of total China deaths in 2010.

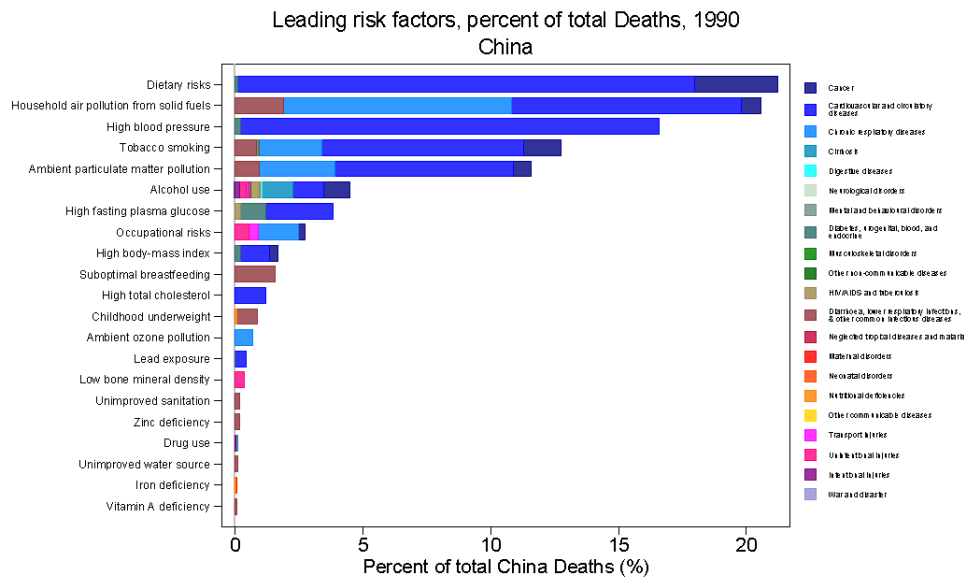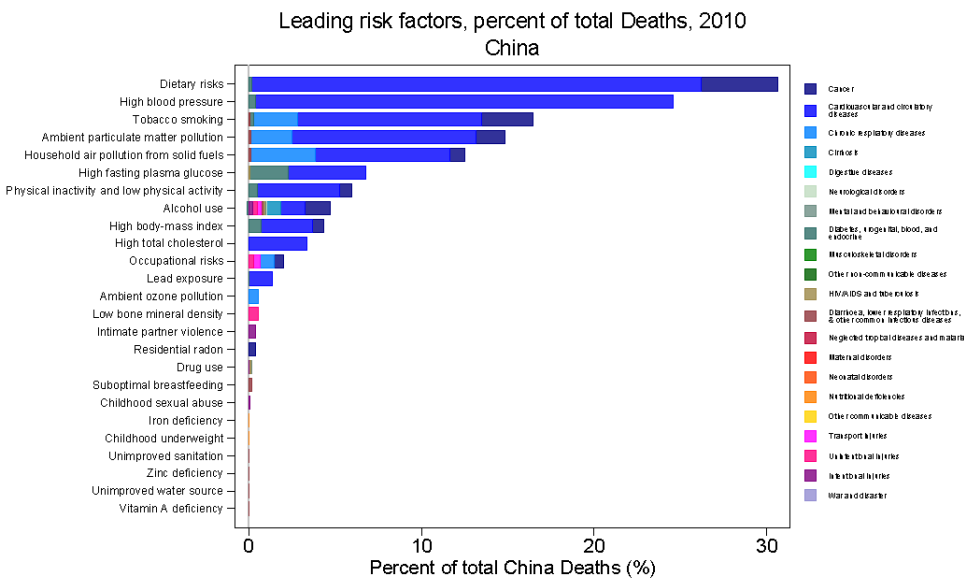

Webappendix Table 1: A list of the major sources of information used to assess causes of death in China including population-based cancer registry data.

| <b>Webappendix Table 1 - Sources of information used to assess causes of death in China including population-based cancer registry data</b> |                                                                                                                                                           |                                   |                                                                                                                                                                                                                                      |
|---------------------------------------------------------------------------------------------------------------------------------------------|-----------------------------------------------------------------------------------------------------------------------------------------------------------|-----------------------------------|--------------------------------------------------------------------------------------------------------------------------------------------------------------------------------------------------------------------------------------|
| <b>Source Type</b>                                                                                                                          | <b>Geographic Coverage</b>                                                                                                                                | <b>Study Time Period</b>          | <b>Citation</b>                                                                                                                                                                                                                      |
| VA National                                                                                                                                 | National                                                                                                                                                  | 2004-2005                         | China Third Retrospective Survey on mortality. , 2004.                                                                                                                                                                               |
| Surveillance                                                                                                                                | National                                                                                                                                                  | 1989-2011                         | Chinese Center for Disease Control and Prevention (CCDC). China Disease Surveillance Points.                                                                                                                                         |
| VA Subnational                                                                                                                              | Qingzhen County, Zhenning Autonomous County of Bouyei and Miao Nationalities, Ziyun Autonomous County of Miao and Bouyei Nationalities (Guizhou Province) | 1985-1987                         | Huang W, Yu H, Wang F, Li G. Infant mortality among various nationalities in the middle part of Guizhou, China. Soc Sci Med 1997; 45: 1031–40.                                                                                       |
| Cancer Registry                                                                                                                             | Subnational                                                                                                                                               | 1980-2007                         | Institute for Health Metrics and Evaluation. Institute for Health Metrics and Evaluation Cancer Registry Database. [Unpublished].                                                                                                    |
| VA Subnational                                                                                                                              | 66 hospitals in 11 cities, Jiangsu Province                                                                                                               | 1980-1981                         | Liu BL, Zhang DZ, Tao HQ, Huang P. Perinatal mortality rate in 11 Jiangsu cities. Chin Med J 1985; 98: 157–60.                                                                                                                       |
| VR                                                                                                                                          | National                                                                                                                                                  | 2002-2007                         | Ministry of Health (China). China Vital Registration – Deaths. [Unpublished]                                                                                                                                                         |
| Surveillance                                                                                                                                | National                                                                                                                                                  | 1970-2008                         | Ministry of Health, Ministry of Public Security, Ministry of Agriculture, State Food and Drug Administration. China the status of rabies prevention and control. , 2009.                                                             |
| Surveillance                                                                                                                                | National - Child Mortality (Ages Under 5)                                                                                                                 | 1991-2008                         | The Ministry of Health Maternal and Child Health and Community Health Division. Annual Report of the National Maternal and Child Health Monitoring and Communication. , 2009.                                                        |
| Surveillance                                                                                                                                | National - Maternal Mortality (Ages 15 - 49)                                                                                                              | 1989-2008                         | The Ministry of Health Maternal and Child Health and Community Health Division. Annual Report of the National Maternal and Child Health Monitoring and Communication. , 2009.                                                        |
| Police Records                                                                                                                              | National                                                                                                                                                  | 1981-1982, 1984-1986<br>2002-2008 | UNODC. Homicide Statistics. 2011. <a href="http://www.unodc.org/unodc/en/data-and-analysis/homicide.html">http://www.unodc.org/unodc/en/data-and-analysis/homicide.html</a> (accessed 21 Dec2011).                                   |
| VA Subnational                                                                                                                              | 14 DSP sites                                                                                                                                              | 2002-2004                         | Wang L, Yang G, Jiemin M, et al. Evaluation of the quality of cause of death statistics in rural China using verbal autopsies. J Epidemiol Community Health 2007; 61: 519–26.                                                        |
| VR                                                                                                                                          | National                                                                                                                                                  | 1987-2000                         | World Health Organization (WHO). WHO Mortality Database. Geneva, Switzerland: World Health Organization (WHO).                                                                                                                       |
| Surveillance                                                                                                                                | National                                                                                                                                                  | 2002-2009                         | Zhang F, Dou Z, Ma Y, et al. Effect of earlier initiation of antiretroviral treatment and increased treatment coverage on HIV-related mortality in China: a national observational cohort study. Lancet Infect Dis 2011; 11: 516–24. |
| Police Records                                                                                                                              | National                                                                                                                                                  | 2000-2005                         | Zhang W. Road safety in China: challenges and opportunities. 2008.<br><a href="http://deepblue.lib.umich.edu/handle/2027.42/60474">http://deepblue.lib.umich.edu/handle/2027.42/60474</a> (accessed 26 Jul2012).                     |
